# Supplementary material
Source: PubMed Central journal article supplement (PMC3061036)
Supplement: emboj201132s1.pdf [file emboj201132s1.pdf]

Supplemental Information

Red1 Promotes the Selective Elimination of Meiosis-Specific Transcripts in Growing Fission Yeast

Tomoyasu Sugiyama and Rie Sugioka-Sugiyama

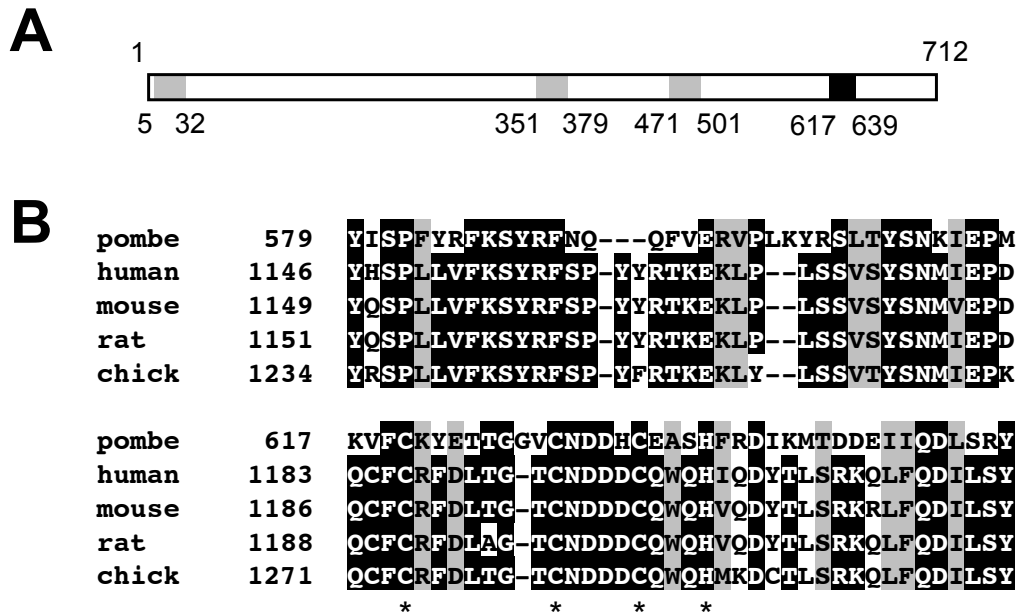

**Supplementary Figure S1** A multiple alignment of Zn-finger domains of Red1 and Red1 homologs. **(A)** Schematic representation of Red1 protein. The gray and black boxes represent the coiled-coil domain and the CCCH-type Zn-finger domain, respectively. **(B)** The amino acid sequences of Zn-finger domains in Red1 (NP\_594850) and Red1 homologs in human (NP\_659419), mouse (NP\_001028433), rat (XP\_235146), and chicken (XP\_416097) were aligned by Basic ClustalW alignment (<http://insilico.ehu.es/clustalw/>). The asterisks indicate the conserved cysteine and histidine residues in the Zn-finger. The black and gray shades indicate identical and similar amino acid residues, respectively.

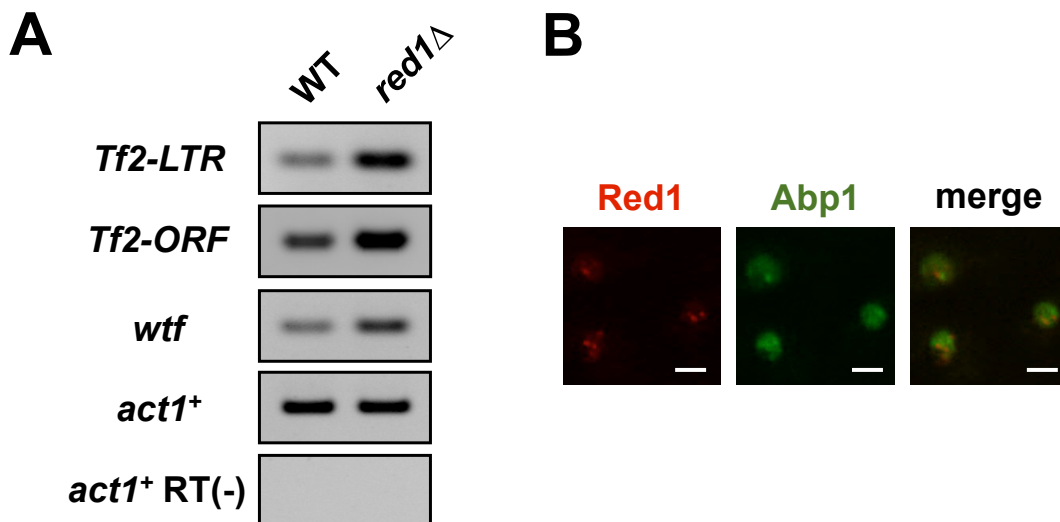

**Supplementary Figure S2** Red1 and CENP-B proteins coordinate to suppress transposons. **(A)** RT-PCR of *Tf2-LTR*, *Tf2-ORF*, and *wtf* RNAs derived from transposable elements. These transcripts are significantly increased in *red1* $\Delta$  cells. **(B)** Localization patterns of Red1 and Abp1. Fluorescent microscopy demonstrates that Red1-tdTomato does not co-localize with the GFP-tagged CENP-B protein, Abp1 in growing fission yeast. Bars, 2  $\mu$ m.

**A**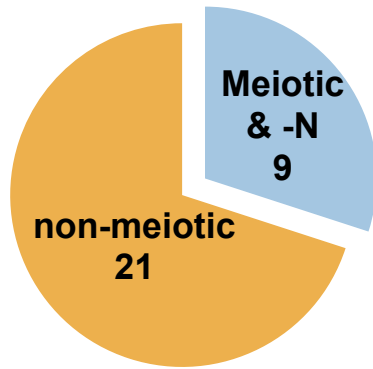**B**

| gene name                | relative decrease |
|--------------------------|-------------------|
| SPBPB10D8.03             | 0.036             |
| <i>alr2</i> <sup>+</sup> | 0.039             |
| SPAC750.07c              | 0.077             |
| SPBPB10D8.02c            | 0.078             |
| SPAC212.08c              | 0.086             |
| SPBC359.04c              | 0.120             |
| SPBPB10D8.01             | 0.158             |
| SPAC17A2.11              | 0.212             |
| SPCC330.03c              | 0.2133            |
| SPAC212.04c              | 0.261             |

**C**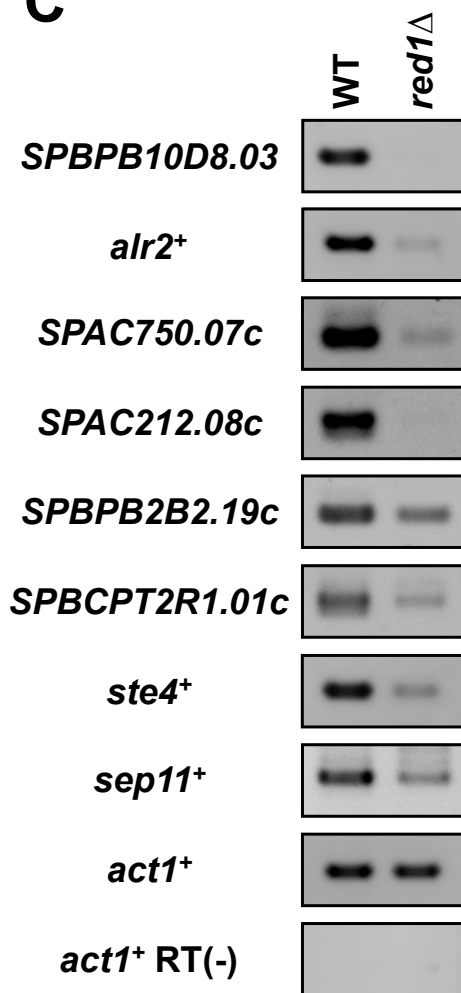**D**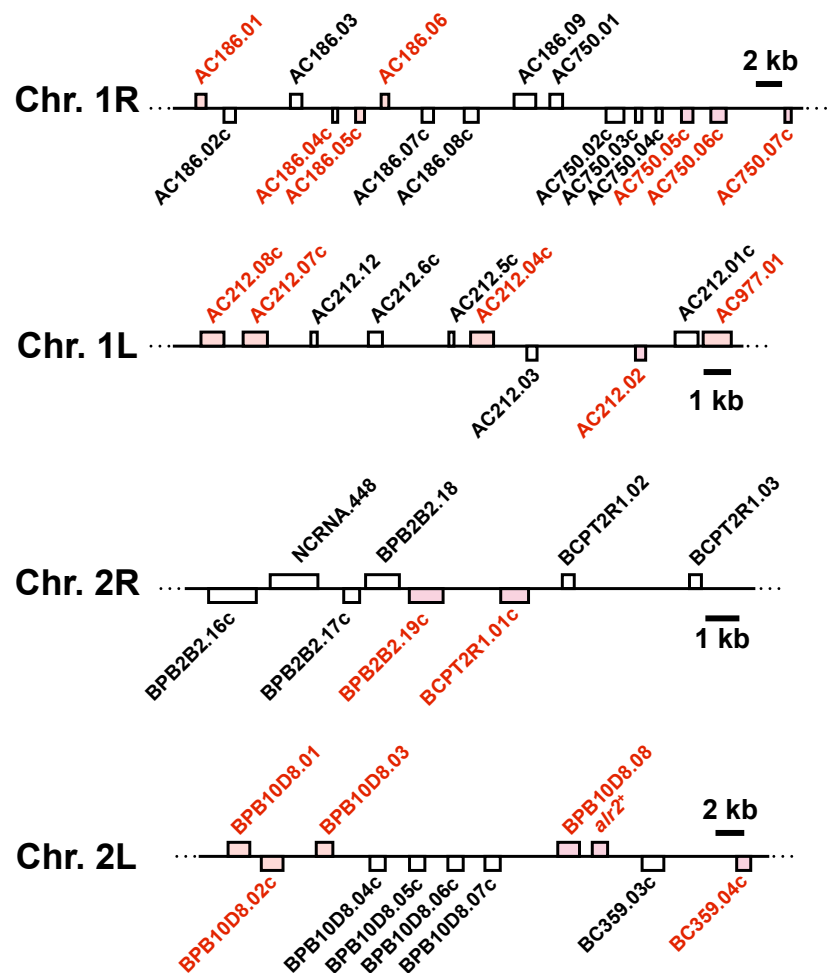

**Supplementary Figure S3** Red1 is required for relatively small number of genes. (A) Pie chart of decreased mRNAs (total 30 genes) in *red1Δ* cells. These downregulated mRNAs were classified into two categories, meiotic and non-meiotic genes. (B) List of the 10 most decreased genes in *red1Δ*. (C) Expression of various subtelomeric, *ste4*<sup>+</sup>, and *sep11*<sup>+</sup> mRNAs in wild-type and *red1Δ* strains. The results obtained from the expression array were confirmed by conventional RT-PCR analyses. (D) Schematic representation of subtelomeric loci of chromosomes 1 and 2, in which the genes decreased in *red1Δ* are relatively enriched. The genes decreased in *red1Δ* are shown by red letters and boxes.

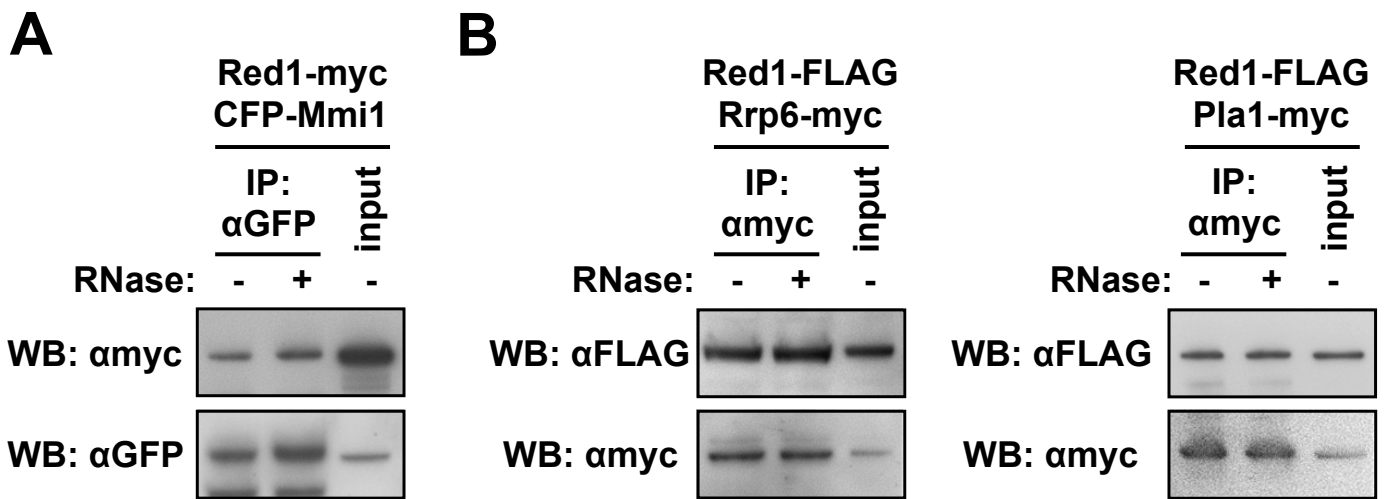

**Supplementary Figure S4** Red1 interactions with Mmi1/Rrp6/Pla1 are not sensitive to RNase treatment. Total cell extracts prepared from a strain expressing Red1-myc/CFP-Mmi1, Red1-FLAG/Rrp6-myc, and Red1-FLAG/Pla1-myc were subjected to immunoprecipitation using the indicated antibodies. Immuno-protein complexes recovered by protein A/G agarose were treated with both RNase A and RNase T1, followed by western blotting.

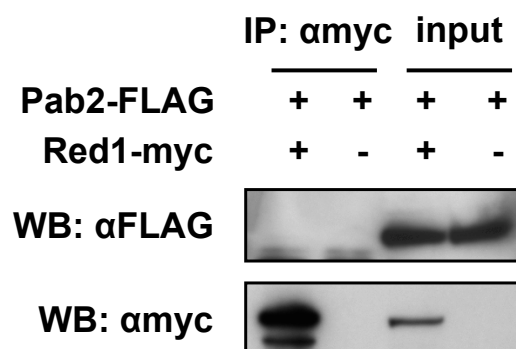

**Supplementary Figure S5** Pab2 does not co-immunoprecipitate with Red1 in mitotic cells. Total cell extracts prepared from a strain expressing Pab2-FLAG and Red1-myc/Pab2-FLAG were subjected to immunoprecipitation, followed by western blotting. Red1 does not interact with Pab2 under our experimental conditions.

**A**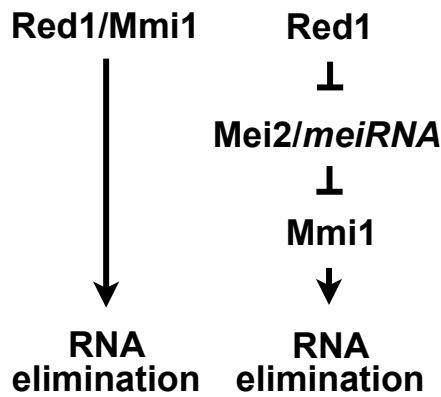**B**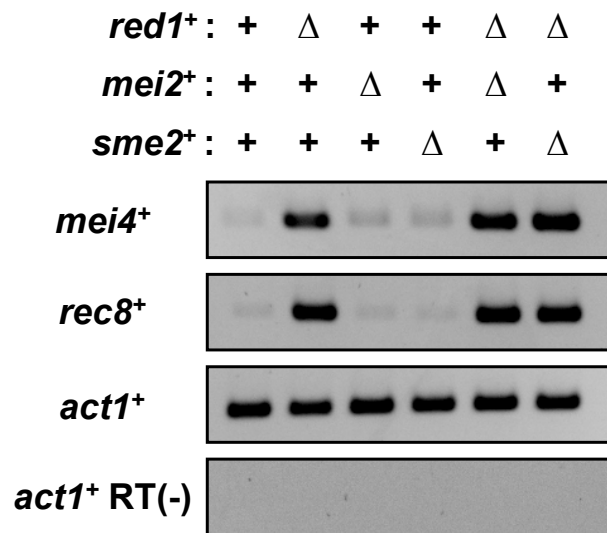

**Supplementary Figure S6** Red1 downregulates meiotic mRNAs independently of Mei2 and *meiRNA*. **(A)** Two possible pathways for meiotic mRNA elimination. One possibility is that Red1 and Mmi1 promote DSR-mediated RNA decay. The other possibility is that Red1 inhibits Mei2/*meiRNA*, and then Mmi1 facilitates the selective removal of meiotic mRNAs. **(B)** The expression levels of *mei4*<sup>+</sup> and *rec8*<sup>+</sup> mRNAs in mitotic wild-type, *red1*Δ, *mei2*Δ, *sme2*Δ, *red1*Δ*mei2*Δ, and *red1*Δ*sme2*Δ cells analysed by RT-PCR indicate that the accumulation of these mRNAs is also observed in *red1*Δ*mei2*Δ and *red1*Δ*sme2*Δ cells.

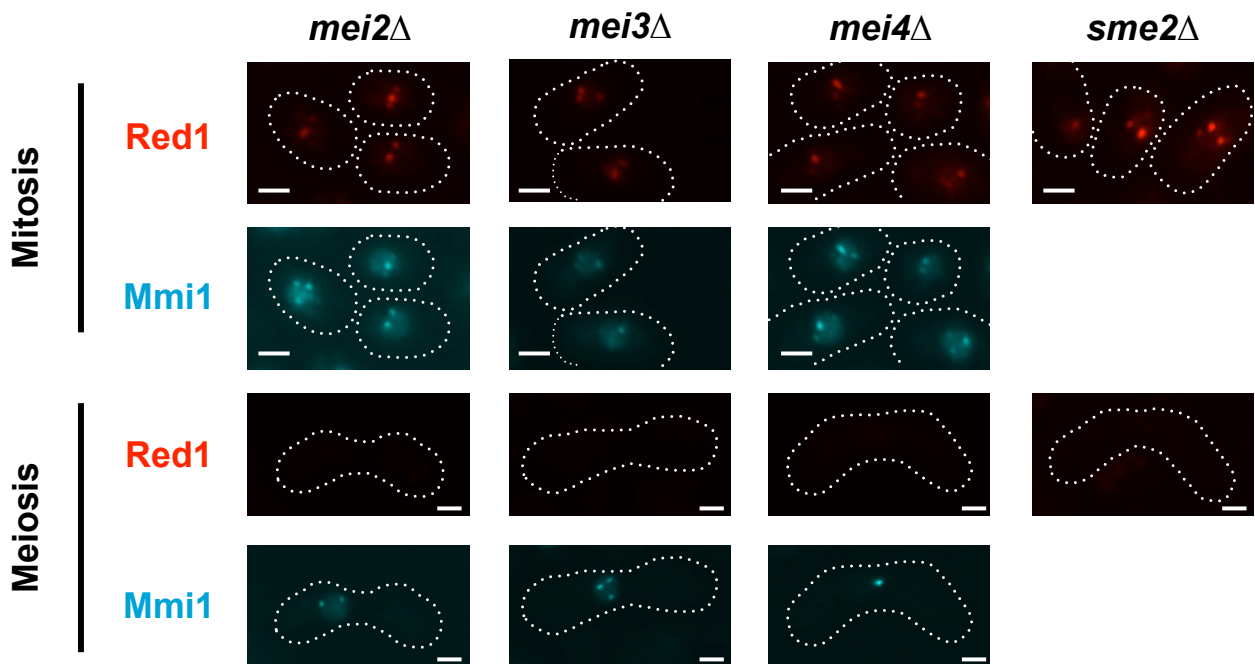

**Supplementary Figure S7** Red1 disappears independently of *mei2*<sup>+</sup>/*mei3*<sup>+</sup>/*mei4*<sup>+</sup>/*sme2*<sup>+</sup> during meiosis. *mei2*Δ, *mei3*Δ, or *mei4*Δ cells expressing Red1-tdTomato/CFP-Mmi1 and *sme2*Δ cells expressing Red1-tdTomato were cultured in rich media at 30°C for vegetative growth or nitrogen-starved media at 26°C to induce meiosis. Representative images of each strain are shown, and the shapes of cells are indicated with white dotted lines. Bars, 2 μm.

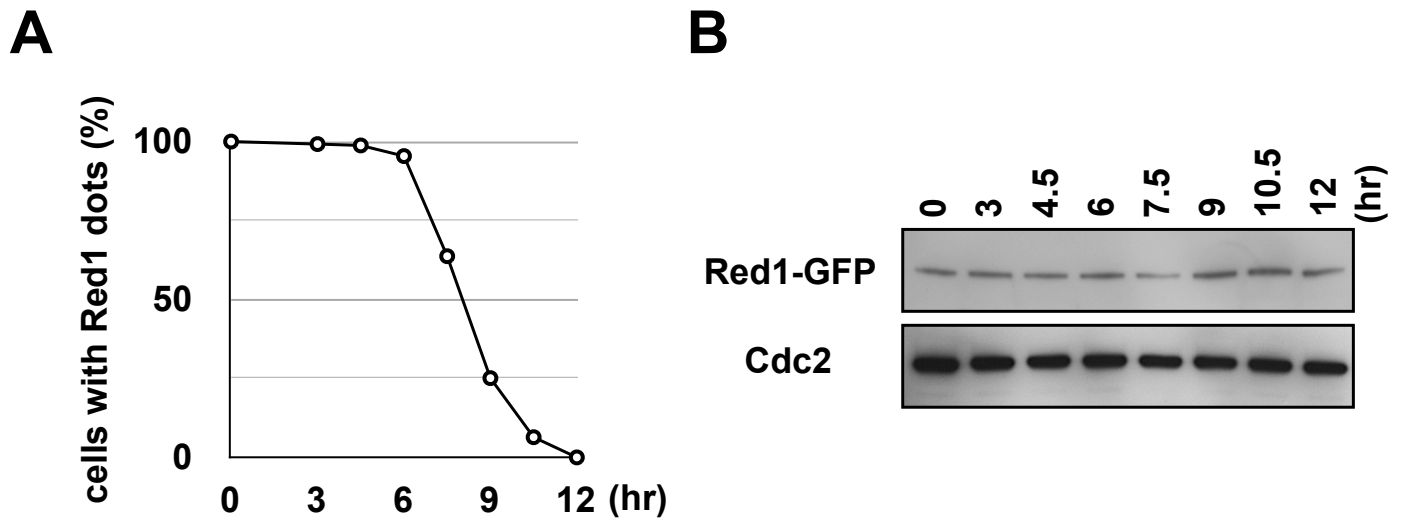

**Supplementary Figure S8** Loss of Red1 foci in response to the pheromone signaling does not accompany the change in Red1 protein level. *h* cells carrying *lys1+::matPc* and Red1-GFP were cultured in liquid EMM without nitrogen at 26°C to activate the pheromone signaling. The percentage of cells with Red1 foci (**A**) and Red1-GFP levels (**B**) were monitored by microscopic analyses and western blotting, respectively.

Table SI. List of *S. pombe* strains used in this study

| Strain  | Genotype                                                                                                                                                                             | Source     |
|---------|--------------------------------------------------------------------------------------------------------------------------------------------------------------------------------------|------------|
| ay449   | <i>h<sup>90</sup> leu1 ura4D18 ade6-M216 LEU2-CFP-mmi1</i>                                                                                                                           | Yamamoto M |
| FY7354  | <i>h<sup>90</sup> leu1 ura4D18 mei4-HA::LEU2</i>                                                                                                                                     | NBRP       |
| FY12806 | <i>h<sup>90</sup> leu1-32 ura4D18 ade6-M210</i>                                                                                                                                      | NBRP       |
| FY13293 | <i>h<sup>90</sup> leu1 ura4D18 ade6-M210 mei2Δ::ura4<sup>+</sup></i>                                                                                                                 | NBRP       |
| FY13308 | <i>h<sup>90</sup> leu1 ura4D18 ade6-M210 sme2Δ::ura4<sup>+</sup></i>                                                                                                                 | NBRP       |
| FY16231 | <i>h<sup>-</sup> leu1 mei4-P572</i>                                                                                                                                                  | NBRP       |
| FY16846 | <i>h<sup>-</sup> lys3 mcp5-9myc-3UTR-lys3<sup>+</sup></i>                                                                                                                            | NBRP       |
| SP238   | <i>h<sup>90</sup> leu1-32 ura4D18 ade6-M210 red1-tdTomato::kan<sup>r</sup></i>                                                                                                       | this study |
| SP253   | <i>h<sup>90</sup> leu1-32 ura4D18 ade6-M210 red1Δ::kan<sup>r</sup></i>                                                                                                               | this study |
| SP286   | <i>h<sup>90</sup> leu1 ura4D18 ade6-M216 red1-tdTomato::kan<sup>r</sup> LEU2-CFP-mmi1</i>                                                                                            | this study |
| SP558   | <i>h<sup>90</sup> leu1-32 ura4D18 ade6-M210 red1-tdTomato::kan<sup>r</sup> sme2Δ::ura4<sup>+</sup></i>                                                                               | this study |
| SP568   | <i>h<sup>90</sup> leu1-32 ura4D18 ade6-M210 red1-GFP::kan<sup>r</sup></i>                                                                                                            | this study |
| SP571   | <i>h<sup>90</sup> leu1-32 ura4D18 ade6-M210 red1-FLAG::kan<sup>r</sup></i>                                                                                                           | this study |
| SP573   | <i>h<sup>+</sup>/h<sup>-</sup> leu1-32/leu1-32 ura4D18/ura4D18 his3<sup>+</sup>/his3D1 ade6-M210/ade6-M216 arg3<sup>+</sup>/arg3D4 red1Δ::kan<sup>r</sup>/red1Δ::kan<sup>r</sup></i> | this study |
| SP583   | <i>h<sup>-</sup> leu1-32 ura4D18 ade6-M216 pat1-114 red1-tdTomato::kan<sup>r</sup></i>                                                                                               | this study |
| SP590   | <i>h<sup>-</sup> leu1-32 ura4DS/E ade6-M216 lys1<sup>+</sup>-ura4-mei4DSR::kan<sup>r</sup></i>                                                                                       | this study |
| SP591   | <i>h<sup>+</sup>/h<sup>-</sup> leu1-32/leu1-32 ura4D18/ura4D18 his3<sup>+</sup>/his3D1 ade6-M210/ade6-M216 arg3<sup>+</sup>/arg3D4</i>                                               | this study |
| SP599   | <i>h<sup>90</sup> leu1-32 ura4D18 ade6-M210 rrp6Δ::kan<sup>r</sup></i>                                                                                                               | this study |
| SP613   | <i>h<sup>90</sup> leu1-32 ura4D18 ade6-M216 red1-tdTomato::kan<sup>r</sup> LEU2-CFP-mmi1 mei2Δ::ura4<sup>+</sup></i>                                                                 | this study |
| SP616   | <i>h<sup>90</sup> leu1-32 ura4D18 ade6-M216 red1Δ::kan<sup>r</sup> mei4Δ::hyg<sup>r</sup></i>                                                                                        | this study |
| SP618   | <i>h<sup>-</sup> leu1-32 ura4DS/E ade6-M216 lys1<sup>+</sup>-ura4-mei4DSR::kan<sup>r</sup> red1Δ::hyg<sup>r</sup></i>                                                                | this study |
| SP624   | <i>h<sup>-</sup> leu1-32 ura4DS/E ade6-M216 lys1<sup>+</sup>-ura4-mei4DSR::kan<sup>r</sup> mmi1-619::nat<sup>r</sup></i>                                                             | this study |
| SP636   | <i>h<sup>90</sup> leu1-32 ura4D18 ade6-M210 red1<sup>H637L</sup>-GFP::kan<sup>r</sup></i>                                                                                            | this study |
| SP652   | <i>h<sup>90</sup> leu1-32 ura ade6-M210 red1-tdTomato::kan<sup>r</sup> LEU2-CFP-mmi1 mei3Δ::LEU2</i>                                                                                 | this study |
| SP659   | <i>h<sup>90</sup> leu1-32 ura4D18 ade6-M210 red1-tdTomato::kan<sup>r</sup> LEU2-CFP-mmi1 mei4Δ::ura4<sup>+</sup></i>                                                                 | this study |
| SP674   | <i>h<sup>90</sup> leu1 ura4D18 ade6-M210 red1Δ::kan<sup>r</sup> mei2Δ::ura4<sup>+</sup></i>                                                                                          | this study |
| SP676   | <i>h<sup>90</sup> leu1 ura4D18 ade6-M210 red1Δ::kan<sup>r</sup> sme2Δ::ura4<sup>+</sup></i>                                                                                          | this study |
| SP754   | <i>h<sup>90</sup> leu1-32 ura4D18 ade6-M216 red1-myc::kan<sup>r</sup></i>                                                                                                            | this study |
| SP827   | <i>h<sup>90</sup> leu1-32 ura4D18 ade6-M216 red1-tdTomato::kan<sup>r</sup> pcj11-GFP::kan<sup>r</sup></i>                                                                            | this study |
| SP892   | <i>h<sup>90</sup> leu1-32 ura4D18 ade6-M216 red1-myc::kan<sup>r</sup> LEU2-CFP-mmi1</i>                                                                                              | this study |
| SP893   | <i>mat1Msm10 leu1-32 ura4D18 ade6-M216 red1-tdTomato::kan<sup>r</sup> abp1-GFP::kan<sup>r</sup></i>                                                                                  | this study |
| SP898   | <i>h<sup>90</sup> leu1-32 ura4D18 ade6-M216 red1Δ::hyg<sup>r</sup> rep1Δ::kan<sup>r</sup></i>                                                                                        | this study |
| SP955   | <i>h<sup>90</sup> leu1-32 ura4D18 ade6-M216 red1-myc::kan<sup>r</sup> LEU2-CFP-mmi1 mei4Δ::ura4<sup>+</sup></i>                                                                      | this study |
| SP972   | <i>h<sup>90</sup> leu1-32 ura4D18 ade6-M210 pab2-FLAG::kan<sup>r</sup></i>                                                                                                           | this study |
| SP981   | <i>h<sup>-</sup> lys1<sup>+</sup>::matPc pat1-114 red1-tdTomato::kan<sup>r</sup></i>                                                                                                 | this study |
| SP1008  | <i>h<sup>-</sup> leu1 mei4-P572 red1Δ::kan<sup>r</sup></i>                                                                                                                           | this study |
| SP1009  | <i>h<sup>90</sup> leu1-32 ura4<sup>?</sup> ade6<sup>?</sup> mei4-HA::LEU2 red1Δ::hyg<sup>r</sup></i>                                                                                 | this study |
| SP1020  | <i>h<sup>90</sup> leu1-32 ura4D18 ade6-M216 red1-tdTomato::kan<sup>r</sup> rrp6-GFP::kan<sup>r</sup></i>                                                                             | this study |
| SP1022  | <i>h<sup>90</sup> leu1-32 ura4D18 ade6<sup>?</sup> red1-myc::kan<sup>r</sup> pab2-FLAG::kan<sup>r</sup></i>                                                                          | this study |
| SP1024  | <i>h<sup>90</sup> leu1-32 ura4D18 ade6-M210 red1-FLAG::kan<sup>r</sup> rrp6-myc::kan<sup>r</sup></i>                                                                                 | this study |
| SP1050  | <i>h<sup>90</sup> leu1-32 ura4D18 ade6-M210 red1-tdTomato::kan<sup>r</sup> pla1-GFP::kan<sup>r</sup></i>                                                                             | this study |
| SP1052  | <i>h<sup>90</sup> leu1-32 ura4D18 ade6-M210 red1-FLAG::kan<sup>r</sup> pla1-myc::kan<sup>r</sup></i>                                                                                 | this study |
| SP1078  | <i>h<sup>-</sup> leu1<sup>?</sup> ura4<sup>?</sup> ade6-M210 mcp5-9myc-3UTR-lys3<sup>+</sup> red1Δ::kan<sup>r</sup></i>                                                              | this study |

Table SI. List of *S. pombe* strains used in this study (continued)

| Strain | Genotype                                                                                                         | Source     |
|--------|------------------------------------------------------------------------------------------------------------------|------------|
| SP1111 | <i>h leu1 mei4-P572 mmi1Δkan<sup>r</sup></i>                                                                     | this study |
| SP1163 | <i>h<sup>90</sup> leu1-32 ura4D18 ade6-M216 red1-tdTomato::kan<sup>r</sup> pab2-GFP::kan<sup>r</sup></i>         | this study |
| SP1167 | <i>h<sup>90</sup> leu1-32 ura4D18 ade6-M210 red1Δ::hyg<sup>r</sup> rrp6Δ::kan<sup>r</sup></i>                    | this study |
| SP1208 | <i>h<sup>90</sup> leu1 ura4D18 ade6-M216 red1-tdTomato::kan<sup>r</sup> LEU2-CFP-mmi1 fus1Δ::hyg<sup>r</sup></i> | this study |
| SP1227 | <i>h lys1<sup>+</sup>::matPc pat1-114 red1-tdTomato::kan<sup>r</sup> mei2Δ::hyg<sup>r</sup></i>                  | this study |
| SP1318 | <i>h lys1<sup>+</sup>::matPc pat1-114 red1-GFP::kan<sup>r</sup></i>                                              | this study |

Table SII. List of genes upregulated in *red1*Δ cells

| Systematic ID | Name                                                  | Product                                                 | Classification | Mmi1 regulated     | Pab2 regulated   |
|---------------|-------------------------------------------------------|---------------------------------------------------------|----------------|--------------------|------------------|
| SPAC6G9.13c   | <i>bqt1</i> <sup>+</sup>                              | bouquet formation protein Bqt1                          | early          | Yes <sup>A,C</sup> | -                |
| SPAC1002.06c  | <i>bqt2</i> <sup>+</sup>                              | bouquet formation protein Bqt2                          | early          | -                  | -                |
| SPBC2G2.09c   | <i>crs1</i> <sup>+</sup>                              | meiosis specific cyclin Crs1                            | early          | Yes <sup>A,C</sup> | -                |
| SPAC1093.06c  | <i>dhc1</i> <sup>+</sup>                              | dynein heavy chain                                      | early          | Yes <sup>C</sup>   | -                |
| SPBC646.17c   | <i>dic1</i> <sup>+</sup>                              | dynein intermediate chain                               | early          | Yes <sup>C</sup>   | Yes <sup>B</sup> |
| SPAC458.04c   | <i>dil1</i> <sup>+</sup>                              | dynein intermediate light chain Dil1                    | early          | Yes <sup>A,C</sup> | -                |
| SPBC1718.02   | <i>hop1</i> <sup>+</sup>                              | linear element associated protein Hop1                  | early          | Yes <sup>C</sup>   | -                |
| SPBC582.06c   | <i>mcp6</i> <sup>+</sup>                              | horsetail movement protein Hrs1/Mcp6                    | early          | Yes <sup>C</sup>   | Yes <sup>B</sup> |
| SPAC13A11.03  | <i>mcp7</i> <sup>+</sup>                              | meiosis specific coiled-coil protein                    | early          | Yes <sup>C</sup>   | -                |
| SPCC1223.12c  | <i>meu10</i> <sup>+</sup>                             | GPI anchored cell surface protein                       | early          | Yes <sup>C</sup>   | Yes <sup>B</sup> |
| SPAC222.15    | <i>meu13</i> <sup>+</sup>                             | Tat binding protein-interacting protein (TBPIP) homolog | early          | Yes <sup>C</sup>   | Yes <sup>B</sup> |
| SPAP27G11.08c | <i>meu32</i> <sup>+</sup> / <i>mug11</i> <sup>+</sup> | sequence orphan                                         | early          | Yes <sup>A,C</sup> | Yes <sup>B</sup> |
| SPCC11E10.03  | <i>mug1</i> <sup>+</sup>                              | dynactin complex subunit                                | early          | Yes <sup>A,C</sup> | Yes <sup>B</sup> |
| SPAC57A10.04  | <i>mug10</i> <sup>+</sup>                             | Rho guanine nucleotide exchange factor                  | early          | Yes <sup>C</sup>   | Yes <sup>B</sup> |
| SPAC17A5.18c  | <i>mug19</i> <sup>+</sup> / <i>rec25</i> <sup>+</sup> | meiotic recombination protein Rec25                     | early          | Yes <sup>A,C</sup> | Yes <sup>B</sup> |
| SPBC216.02    | <i>mug21</i> <sup>+</sup> / <i>mcp5</i> <sup>+</sup>  | cortical anchoring factor for dynein                    | early          | Yes <sup>C</sup>   | -                |
| SPBC31F10.05  | <i>mug37</i> <sup>+</sup>                             | sequence orphan                                         | early          | Yes <sup>C</sup>   | -                |
| SPCC1393.07c  | <i>mug4</i> <sup>+</sup>                              | sequence orphan                                         | early          | -                  | Yes <sup>B</sup> |
| SPBC577.05c   | <i>mug41</i> <sup>+</sup> / <i>rec27</i> <sup>+</sup> | meiotic recombination protein                           | early          | -                  | -                |
| SPBP8B7.04    | <i>mug45</i> <sup>+</sup>                             | sequence orphan                                         | early          | Yes <sup>C</sup>   | Yes <sup>B</sup> |
| SPAC14C4.08   | <i>mug5</i> <sup>+</sup>                              | sequence orphan                                         | early          | -                  | -                |
| SPAC32A11.01  | <i>mug8</i> <sup>+</sup>                              | conserved fungal protein                                | early          | Yes <sup>C</sup>   | Yes <sup>B</sup> |
| SPCC70.09c    | <i>mug9</i> <sup>+</sup>                              | conserved fungal protein                                | early          | Yes <sup>A,C</sup> | -                |
| SPAC22F3.03c  | <i>rdh54</i> <sup>+</sup>                             | ATP-dependent DNA helicase Rdh54                        | early          | -                  | Yes <sup>B</sup> |
| SPAC25G10.04c | <i>rec10</i> <sup>+</sup>                             | meiotic recombination protein Rec10                     | early          | Yes <sup>B,C</sup> | Yes <sup>B</sup> |
| SPCC550.16c   | <i>rec11</i> <sup>+</sup>                             | meiotic cohesin complex subunit Rec11                   | early          | Yes <sup>C</sup>   | -                |
| SPBC1711.14   | <i>rec15</i> <sup>+</sup>                             | meiotic recombination protein Rec15                     | early          | -                  | -                |
| SPBC29A10.14  | <i>rec8</i> <sup>+</sup>                              | meiotic cohesin complex subunit Rec8                    | early          | Yes <sup>A,C</sup> | Yes <sup>B</sup> |
| SPBC2D10.06   | <i>rep1</i> <sup>+</sup>                              | MBF transcription factor complex subunit Rep1           | early          | -                  | -                |
| SPBC119.14    | <i>rti1</i> <sup>+</sup>                              | Rad22 homolog Rti1                                      | early          | -                  | -                |
| SPBC29A10.02  | <i>spo5</i> <sup>+</sup>                              | meiotic RNA-binding protein 1                           | early          | Yes <sup>A,C</sup> | Yes <sup>B</sup> |
| SPAC27D7.13c  | <i>ssm4</i> <sup>+</sup>                              | p150-Glued                                              | early          | Yes <sup>A,C</sup> | Yes <sup>B</sup> |
| SPAC22H10.13  | <i>zym1</i> <sup>+</sup>                              | metallothionein                                         | early          | -                  | -                |
| SPAC6C3.05    | -                                                     | sequence orphan                                         | early          | -                  | -                |
| SPAC2E1P3.02c | <i>amt3</i> <sup>+</sup>                              | ammonium transporter Amt3                               | middle         | -                  | -                |
| SPAC1006.04c  | <i>mcp3</i> <sup>+</sup> / <i>mug7</i> <sup>+</sup>   | sequence orphan                                         | middle         | -                  | -                |
| SPBC32H8.11   | <i>mei4</i> <sup>+</sup>                              | meiotic forkhead transcription factor Mei4              | middle         | Yes <sup>A,C</sup> | -                |
| SPAC1556.06   | <i>meu1</i> <sup>+</sup> / <i>meu2</i> <sup>+</sup>   | sequence orphan                                         | middle         | Yes <sup>A,C</sup> | Yes <sup>B</sup> |
| SPCPI732.03   | <i>meu15</i> <sup>+</sup>                             | sequence orphan                                         | middle         | -                  | -                |
| SPAC1A6.08c   | <i>mug125</i> <sup>+</sup>                            | sequence orphan                                         | middle         | -                  | -                |
| SPAC23C4.07   | <i>mug22</i> <sup>+</sup> / <i>tlt2</i> <sup>+</sup>  | meiotically upregulated gene Mug22                      | middle         | Yes <sup>C</sup>   | Yes <sup>B</sup> |
| SPBC32H8.06   | <i>mug93</i> <sup>+</sup>                             | TPR repeat protein, meiotically spliced                 | middle         | -                  | -                |
| SPBC1271.06c  | <i>mug96</i> <sup>+</sup>                             | sequence orphan                                         | middle         | Yes <sup>C</sup>   | -                |
| SPBC16E9.17c  | <i>rem1</i> <sup>+</sup>                              | meiosis-specific cyclin Rem1                            | middle         | -                  | -                |
| SPAC20H4.11c  | <i>rho5</i> <sup>+</sup>                              | Rho family GTPase Rho5                                  | middle         | -                  | -                |
| SPAC22F8.05   | -                                                     | alpha.alpha-trehalose-phosphate synthase                | middle         | -                  | -                |
| SPBPB2B2.07c  | -                                                     | S. pombe specific DUF999 protein family 7               | middle         | -                  | -                |



Table SII. List of genes upregulated in *red1*Δ cells (continued)

| Systematic ID | Name                       | Product                                                                     | Classification | Mmi1 regulated      | Pab2 regulated   |
|---------------|----------------------------|-----------------------------------------------------------------------------|----------------|---------------------|------------------|
| SPCC417.12    | -                          | carboxylesterase-lipase family protein                                      | middle         | -                   | -                |
| SPCC794.04c   | -                          | membrane transporter                                                        | middle         | -                   | -                |
| wtf-pseudo    | -                          | wtf1, 2, 3, 6, 8, 15, 17, 23, 24, and/or 25 (cannot be distinguished)       | middle         | -                   | -                |
| SPAC869.07c   | <i>mell1</i> <sup>+</sup>  | alpha-galactosidase, melibiase                                              | late           | -                   | -                |
| SPAC1002.19   | <i>urg1</i> <sup>+</sup>   | GTP cyclohydrolase II                                                       | late           | -                   | -                |
| SPAC14C4.01c  | -                          | DUF1770 family protein                                                      | late           | -                   | -                |
| SPAC1F7.06    | -                          | ThiJ domain protein                                                         | late           | -                   | -                |
| SPAC23C11.06c | -                          | hydrolase                                                                   | late           | -                   | -                |
| SPAC23H3.15c  | -                          | sequence orphan                                                             | late           | -                   | -                |
| SPAC4H3.03c   | -                          | glucan 1,4-alpha-glucosidase                                                | late           | -                   | -                |
| SPAC869.06c   | -                          | HHE domain cation binding protein                                           | late           | -                   | -                |
| SPACUNK4.17   | -                          | NAD binding dehydrogenase family protein                                    | late           | -                   | -                |
| SPBP4G3.03    | -                          | PI31 proteasome regulator related                                           | late           | -                   | -                |
| SPCC737.04    | -                          | <i>S. pombe</i> specific UPF0300 family protein 6                           | late           | -                   | -                |
| SPAC20G4.03c  | <i>hri1</i> <sup>+</sup>   | eIF2 alpha kinase Hri1                                                      | transient      | -                   | -                |
| SPBPB2B2.06c  | -                          | phosphoprotein phosphatase                                                  | transient      | -                   | -                |
| SPAP8A3.04c   | <i>hsp9</i> <sup>+</sup>   | heat shock protein                                                          | continuous     | -                   | -                |
| SPBC365.12c   | <i>ish1</i> <sup>+</sup>   | LEA domain protein                                                          | continuous     | -                   | -                |
| SPBC16E9.16c  | <i>lsd90</i> <sup>+</sup>  | Lsd90 protein                                                               | continuous     | -                   | -                |
| SPBC56F2.06   | <i>mug147</i> <sup>+</sup> | sequence orphan                                                             | continuous     | -                   | -                |
| SPCC338.12    | <i>pbi2</i> <sup>+</sup>   | proteinase B inhibitor Pbi2                                                 | continuous     | -                   | -                |
| SPAC19G12.09  | -                          | NADH/NADPH dependent indole-3-acetaldehyde reductase AKR3C2                 | continuous     | -                   | -                |
| SPAC25B8.18   | -                          | mitochondrial electron carrier                                              | continuous     | -                   | -                |
| SPAC6B12.03c  | -                          | HbrB family protein                                                         | continuous     | -                   | -                |
| SPAPI691.02   | -                          | yippe-like protein                                                          | continuous     | -                   | -                |
| SPBC8E4.02c   | -                          | sequence orphan                                                             | continuous     | Yes <sup>C</sup>    | -                |
| SPCC70.04c    | -                          | sequence orphan                                                             | continuous     | -                   | -                |
| SPBC23G7.17c  | <i>mat3-m</i>              | mating-type M-specific polypeptide Mi 2                                     | delayed        | -                   | -                |
| SPAPB8E5.05   | <i>mfm1</i> <sup>+</sup>   | M-factor precursor Mfm1                                                     | delayed        | -                   | -                |
| SPBC1347.12   | <i>arp1</i> <sup>+</sup>   | actin-like protein Arp1, forming a complex with mug1/ssm4                   | unassigned     | Yes <sup>C</sup>    | -                |
| SPCC645.02    | <i>gcp4</i> <sup>+</sup>   | mitochondrial matrix PGP phosphatase involved in cardiolipin biosynthesis G | unassigned     | -                   | -                |
| SPAC14C4.03   | <i>mek1</i> <sup>+</sup>   | Cds1/Rad53/Chk2 family protein kinase Mek1                                  | unassigned     | Yes <sup>B, C</sup> | Yes <sup>B</sup> |
| SPBC14C8.05c  | <i>meu17</i> <sup>+</sup>  | glucan-alpha-1,4-glucosidase, probably middle gene                          | unassigned     | -                   | -                |
| SPAC6B12.16   | <i>meu26</i> <sup>+</sup>  | conserved fungal protein                                                    | unassigned     | Yes <sup>A, C</sup> | -                |
| SPAC57A7.11   | <i>mip1</i> <sup>+</sup>   | WD repeat protein, Raptor homolog Mip1                                      | unassigned     | -                   | -                |
| SPAC15E1.07c  | <i>moa1</i> <sup>+</sup>   | meiotic cohesin complex associated protein Moa1                             | unassigned     | Yes <sup>C</sup>    | -                |
| SPAC167.06c   | <i>mug143</i> <sup>+</sup> | sequence orphan, probably middle gene                                       | unassigned     | -                   | -                |
| SPAC13D6.01   | <i>pof14</i> <sup>+</sup>  | F-box protein Pof14                                                         | unassigned     | -                   | -                |
| SPAC1F8.03c   | <i>str3</i> <sup>+</sup>   | siderophore-iron transporter                                                | unassigned     | -                   | -                |
| SPAC458.07    | <i>tfal</i> <sup>+</sup>   | transcription factor TFII alpha subunit Tfa1                                | unassigned     | -                   | -                |
| SPAC1142.09   | -                          | dubious                                                                     | unassigned     | -                   | -                |
| SPAC16E8.16   | -                          | transcription factor TFII B                                                 | unassigned     | -                   | -                |
| SPAC1A6.11    | -                          | dubious                                                                     | unassigned     | -                   | -                |
| SPAC1D4.01    | -                          | human c9orf78 ortholog                                                      | unassigned     | -                   | -                |
| SPAC1F3.08c   | -                          | dubious                                                                     | unassigned     | -                   | -                |
| SPAC1F8.02c   | -                          | sequence orphan                                                             | unassigned     | -                   | -                |
| SPAC22H10.06c | -                          | dubious                                                                     | unassigned     | -                   | -                |

| Table SII. List of genes upregulated in <i>red1</i> Δ cells (continued) |                  |                                                                 |                |                  |                  |
|-------------------------------------------------------------------------|------------------|-----------------------------------------------------------------|----------------|------------------|------------------|
| Systematic ID                                                           | Name             | Product                                                         | Classification | Mmi1 regulated   | Pab2 regulated   |
| SPAC23C11.10                                                            | -                | human c16orf57 ortholog                                         | unassigned     | -                | -                |
| SPAC27F1.10                                                             | -                | sequence orphan                                                 | unassigned     | -                | -                |
| SPAC29E6.07                                                             | -                | sequence orphan                                                 | unassigned     | -                | Yes <sup>B</sup> |
| SPAC2G11.05c                                                            | -                | BRO1 domain protein                                             | unassigned     | -                | Yes <sup>B</sup> |
| SPAC637.03                                                              | -                | conserved fungal protein                                        | unassigned     | -                | -                |
| SPAC9E9.17c                                                             | -                | dubious                                                         | unassigned     | -                | -                |
| SPAP27G11.11c                                                           | -                | dubious                                                         | unassigned     | -                | -                |
| SPAPB1A11.02                                                            | -                | esterase/lipase                                                 | unassigned     | -                | -                |
| SPBC13G1.15c                                                            | -                | sequence orphan                                                 | unassigned     | -                | -                |
| SPBC1711.15c                                                            | -                | sequence orphan                                                 | unassigned     | -                | -                |
| SPBC1921.04c                                                            | -                | dubious                                                         | unassigned     | -                | -                |
| SPBC27.05                                                               | -                | dubious                                                         | unassigned     | -                | -                |
| SPBC336.05c                                                             | -                | S-adenosylmethionine-dependent methyltransferase                | unassigned     | -                | -                |
| SPBC530.02                                                              | -                | membrane transporter                                            | unassigned     | -                | -                |
| SPBC83.19c                                                              | -                | sequence orphan                                                 | unassigned     | Yes <sup>C</sup> | -                |
| SPBC8D2.12c                                                             | -                | mitochondrial translational activator of cytochrome C oxidase I | unassigned     | -                | -                |
| SPBPB2B2.03c                                                            | -                | pseudo-very degraded permease                                   | unassigned     | Yes <sup>C</sup> | -                |
| SPBPB2B2.04                                                             | -                | pseudo-very degraded transporter                                | unassigned     | Yes <sup>C</sup> | -                |
| SPCC1442.11c                                                            | -                | sequence orphan                                                 | unassigned     | -                | -                |
| SPCC191.04c                                                             | -                | dubious                                                         | unassigned     | -                | -                |
| SPCC2H8.02                                                              | -                | inorganic phosphate transporter                                 | unassigned     | -                | -                |
| SPCC569.04                                                              | -                | sequence orphan                                                 | unassigned     | -                | -                |
| SPCC622.05                                                              | -                | dubious                                                         | unassigned     | -                | -                |
| SPAC1348.13                                                             | -                | similar to fragment of cox1 intron protein                      | unassigned     | -                | -                |
| SPBC354.11c                                                             | -                | dubious                                                         | unassigned     | -                | -                |
| SPBC8D2.02c                                                             | -                | vacuolar sorting protein Vps68                                  | unassigned     | -                | -                |
| SPCC417.11c                                                             | -                | glutamate-1-semialdehyde 2,1-aminomutase/aminotransferase       | unassigned     | -                | -                |
| SPCC663.06c                                                             | -                | short chain dehydrogenase                                       | unassigned     | -                | -                |
| wtf                                                                     | -                | wtf1, 5, 9, 17, and/or 21 (cannot be distinguished)             | unassigned     | -                | -                |
|                                                                         | Yes <sup>A</sup> | Harigaya et al., (2006) Nature 442(7098): 45-50.                |                |                  |                  |
|                                                                         | Yes <sup>B</sup> | St-Andre et al., (2010) J. Biol. Chem. 285(36): 27859-27868.    |                |                  |                  |
|                                                                         | Yes <sup>C</sup> | this study and our unpublished data                             |                |                  |                  |

Table SIII. List of genes downregulated in *red1*  $\Delta$  cells

| Systematic ID | Name                      | Product                                                | Classification | Mmi1 regulated   |
|---------------|---------------------------|--------------------------------------------------------|----------------|------------------|
| SPAC750.06c   | -                         | <i>S. pombe</i> specific DUF999 protein family 4       | middle         | -                |
| SPAC212.04c   | -                         | <i>S. pombe</i> specific DUF999 family protein 1       | middle         | -                |
| SPAC212.02    | -                         | sequence orphan                                        | middle         | -                |
| SPBPB2B2.19c  | -                         | <i>S. pombe</i> specific 5Tm protein family            | late           | -                |
| SPAC977.01    | -                         | <i>S. pombe</i> specific 5Tm protein family            | late           | -                |
| SPAC977.16c   | <i>dak2</i> <sup>+</sup>  | dihydroxyacetone kinase                                | delayed        | -                |
| SPAC513.03    | <i>mfm2</i> <sup>+</sup>  | M-factor precursor                                     | delayed        | Yes <sup>A</sup> |
| SPAC1565.04c  | <i>ste4</i> <sup>+</sup>  | adaptor protein                                        | delayed        | -                |
| SPBC359.02    | <i>alr2</i> <sup>+</sup>  | alanine racemase                                       | unassigned     | -                |
| SPAC57A10.03  | <i>cyp1</i> <sup>+</sup>  | cyclophilin                                            | unassigned     | -                |
| SPAC11D3.05   | <i>mfs2</i> <sup>+</sup>  | MFS family membrane transporter                        | unassigned     | -                |
| SPAC5D6.05    | <i>sep11</i> <sup>+</sup> | mediator complex subunit                               | unassigned     | -                |
| SPCC330.03c   | -                         | NADPH-hemoprotein reductase                            | unassigned     | -                |
| SPBC359.01    | -                         | amino acid permease                                    | unassigned     | -                |
| SPBPB10D8.03  | -                         | pseudogene transporter                                 | unassigned     | -                |
| SPBPB10D8.02c | -                         | arylsulfatase                                          | unassigned     | -                |
| SPBPB10D8.01  | -                         | cysteine transporter                                   | unassigned     | -                |
| SPBCPT2R1.01c | -                         | <i>S. pombe</i> specific DUF999 protein family 9       | unassigned     | -                |
| SPBC530.07c   | -                         | TENA/THI family protein                                | unassigned     | -                |
| SPBC359.04c   | -                         | cell surface glycoprotein, DIPSY family                | unassigned     | -                |
| SPBC1348.04   | -                         | methyltransferase                                      | unassigned     | Yes <sup>A</sup> |
| SPAC977.15    | -                         | dienelactone hydrolase family                          | unassigned     | -                |
| SPAC750.07c   | -                         | <i>S. pombe</i> specific GPI anchored protein family 1 | unassigned     | -                |
| SPAC56F8.13   | -                         | dubious                                                | unassigned     | -                |
| SPAC212.08c   | -                         | GPI anchored protein                                   | unassigned     | -                |
| SPAC212.07c   | -                         | pseudogene                                             | unassigned     | -                |
| SPAC186.06    | -                         | ER unfolded protein response protein                   | unassigned     | Yes <sup>A</sup> |
| SPAC186.05c   | -                         | human TMEM165 homolog                                  | unassigned     | Yes <sup>A</sup> |
| SPAC186.01    | -                         | cell surface glycoprotein, DIPSY family                | unassigned     | -                |
| SPAC17A2.11   | -                         | sequence orphan                                        | unassigned     | -                |
|               |                           |                                                        |                |                  |
|               | Yes <sup>A</sup>          | our unpublished data                                   |                |                  |
